# Supplementary material for: Tailoring the conduction band of titanium oxide by doping tungsten for efficient electron injection in a sensitized photoanode
Source: Royal Society of Chemistry journal article supplement (doi:10.1039/c3nr05456j), 2014-01-01
Supplement: c3nr05456j.pdf [file c3nr05456j.pdf]

## Supplementary information

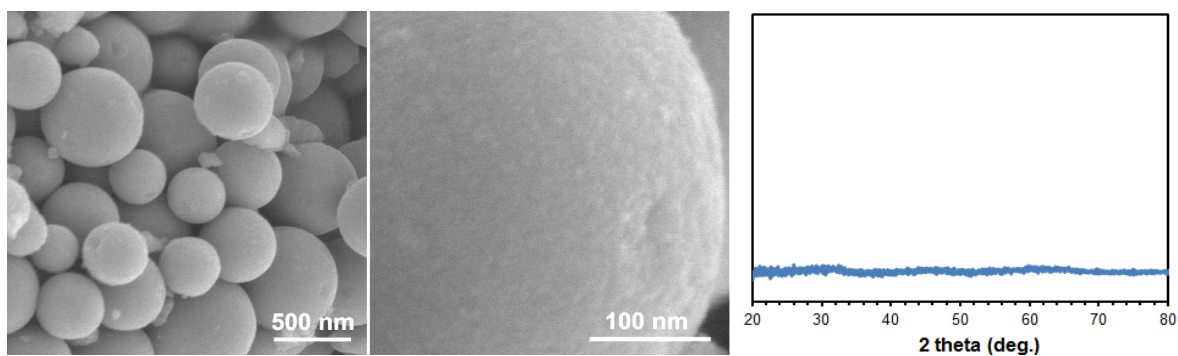

**Figure S1.** SEM images and corresponding XRD of precursor spheres before hydrothermal treatment and doping.

**Table S1.** LA ICPMS analysis results.

| W added in reaction | Unit    | Ti    | W       | W in product |
|---------------------|---------|-------|---------|--------------|
| 0.26 wt%            | % wt/wt | 37.57 | 0.09796 | 0.26 wt%     |

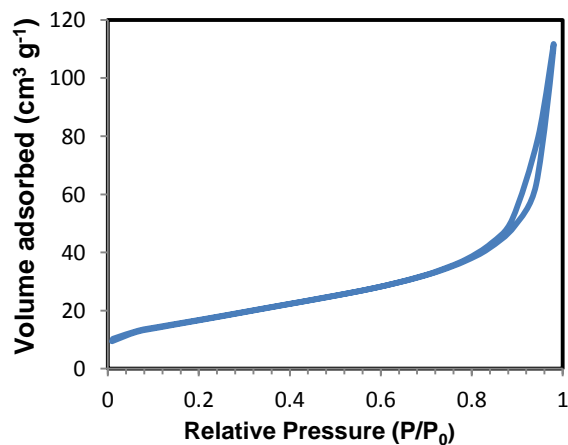

**Figure S2.** Nitrogen sorption isotherms of Degussa P25 nanoparticles.

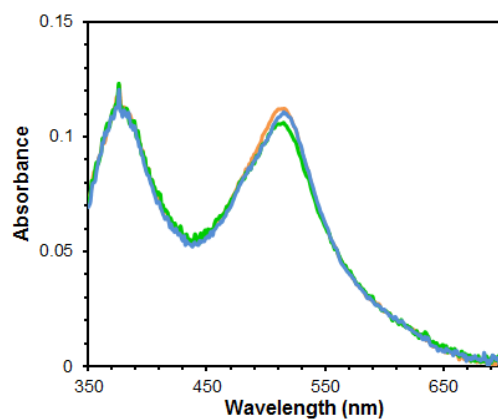

**Figure S3.** Absorbance spectra of the dye detached from sensitized photoanodes prepared using sample **W0**, **W1** and **W2**.

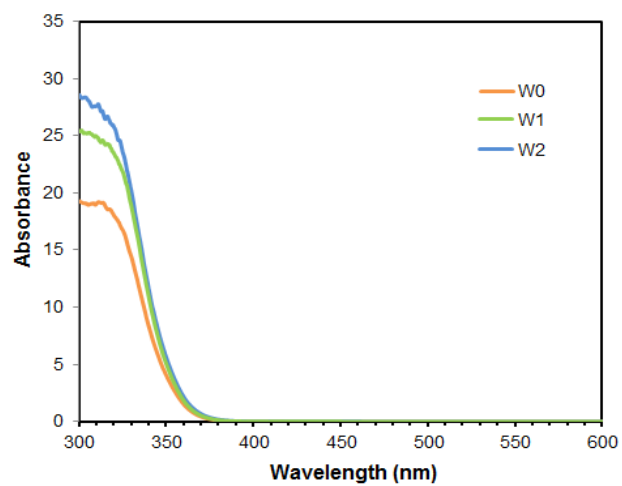

**Figure S4.** UV-vis absorbance spectra of the non-doped and W-doped spherical mesoporous  $\text{TiO}_2$ .

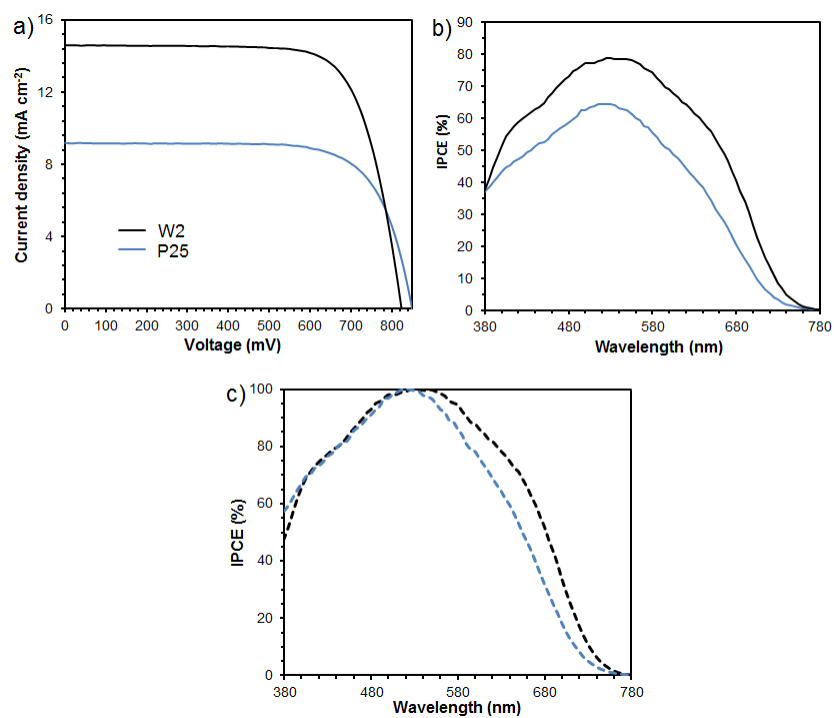

**Figure S5.** Comparisons of a) current – voltage curves, b) IPCE curves and c) normalized IPCE curves of sensitized photoanodes (12  $\mu\text{m}$ ) based Degussa P25 nanoparticles and sample W2.

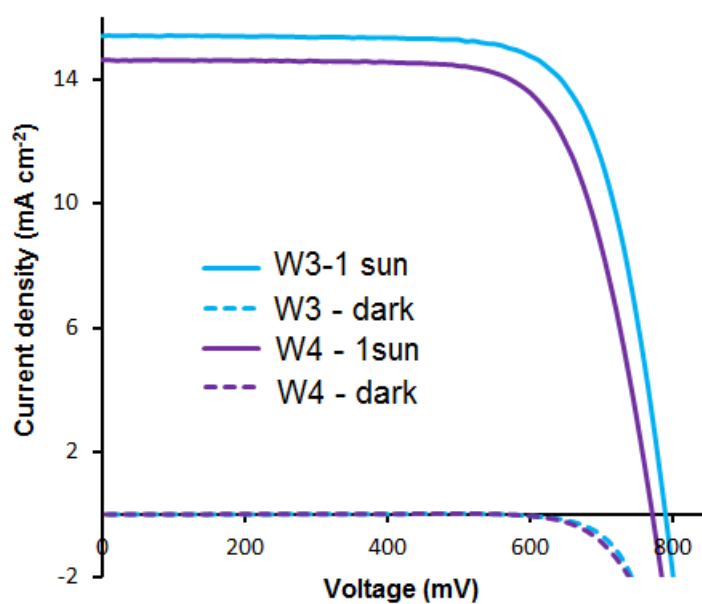

**Figure S6.** Current – voltage curves of sensitized photoanodes based on 0.25 at% (**W3**) and 0.5 at% (**W4**) W-doped spherical mesoporous TiO<sub>2</sub>.
